# Supplementary figures and images for: Magnetic molecularly imprinted microcapsules derived from Pickering emulsion polymerization and their novel adsorption characteristics for λ-cyhalothrin
Source: Royal Society of Chemistry journal article supplement (doi:10.1039/c3ra43178a), 2013-10-28

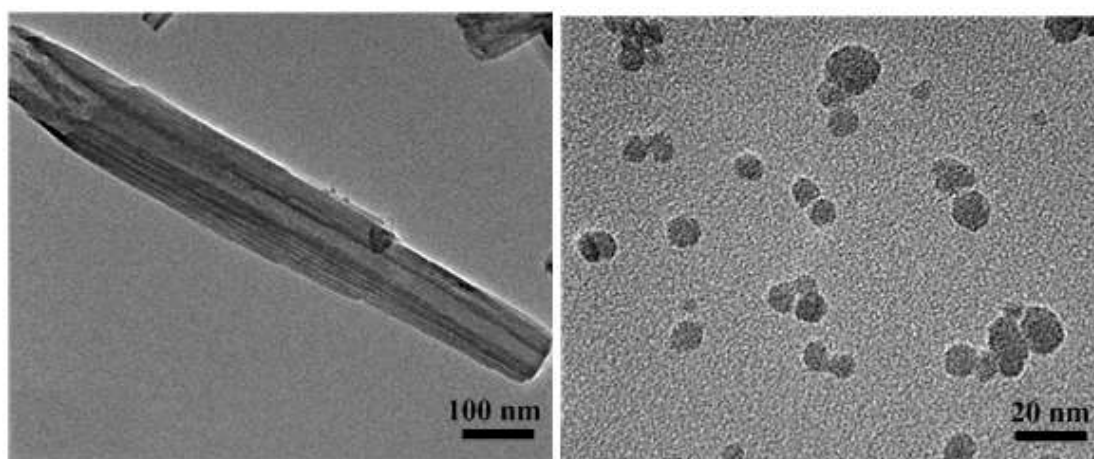

**Figure ES1 TEM pictures of HNTs and HFNs.**

Supplement: c3ra43178a.pdf [file c3ra43178a.pdf]
